# Supplementary material for: Supramolecular Crystal Networks Constructed from Cucurbit[8]uril with Two Naphthyl Groups
Source: MDPI journal article supplement (doi:10.3390/molecules28010063), 2022-12-21

# checkCIF/PLATON report

Structure factors have been supplied for datablock(s) ga\_80425a\_a\_sq

THIS REPORT IS FOR GUIDANCE ONLY. IF USED AS PART OF A REVIEW PROCEDURE FOR PUBLICATION, IT SHOULD NOT REPLACE THE EXPERTISE OF AN EXPERIENCED CRYSTALLOGRAPHIC REFEREE.

No syntax errors found.      CIF dictionary      Interpreting this report

## Datablock: ga\_80425a\_a\_sq

---

Bond precision:    C-C = 0.0076 Å

Wavelength=1.34138

Cell:                a=18.3185(6)                b=18.3357(5)                c=19.5491(6)  
                      alpha=106.191(1)        beta=92.557(1)        gamma=97.633(1)  
Temperature:        170 K

|                | Calculated                                                        | Reported                 |
|----------------|-------------------------------------------------------------------|--------------------------|
| Volume         | 6226.9(3)                                                         | 6226.9(3)                |
| Space group    | P -1                                                              | P -1                     |
| Hall group     | -P 1                                                              | -P 1                     |
| Moiety formula | 2(C48 H48 N32 O16), 4(C21 H17 N2), 2(Cd2 Cl7), 2(Cd ? Cl4), Cl, 2 |                          |
| Sum formula    | C180 H164 Cd6 Cl23 N72 O54                                        | C90 H107.50 Cd3 Cl111.50 |
| Mr             | 5689.64                                                           | 2870.49                  |
| Dx,g cm-3      | 1.517                                                             | 1.531                    |
| Z              | 1                                                                 | 2                        |
| Mu (mm-1)      | 4.731                                                             | 4.732                    |
| F000           | 2859.0                                                            | 2910.0                   |
| F000'          | 2873.17                                                           |                          |
| h,k,lmax       | 22,22,24                                                          | 22,22,24                 |
| Nref           | 25482                                                             | 25389                    |
| Tmin,Tmax      | 0.706,0.753                                                       | 0.617,0.772              |
| Tmin'          | 0.566                                                             |                          |

Correction method= # Reported T Limits: Tmin=0.617 Tmax=0.772  
AbsCorr = MULTI-SCAN

Data completeness= 0.996

Theta(max)= 56.976

R(reflections)= 0.0546( 19734)

wR2(reflections)= 0.1586( 25389)

S = 1.042

Npar= 1689

The following ALERTS were generated. Each ALERT has the format  
**test-name\_ALERT\_alert-type\_alert-level.**  
Click on the hyperlinks for more details of the test.

### Alert level A

|                                             |     |               |       |           |
|---------------------------------------------|-----|---------------|-------|-----------|
| PLAT430_ALERT_2_A Short Inter D...A Contact | O20 | ..026         |       | 2.50 Ang. |
|                                             |     | x,y,z =       | 1_555 | Check     |
| PLAT430_ALERT_2_A Short Inter D...A Contact | O21 | ..023         |       | 2.49 Ang. |
|                                             |     | x,y,z =       | 1_555 | Check     |
| PLAT430_ALERT_2_A Short Inter D...A Contact | O22 | ..025         |       | 2.07 Ang. |
|                                             |     | x,y,z =       | 1_555 | Check     |
| PLAT430_ALERT_2_A Short Inter D...A Contact | O23 | ..025         |       | 2.39 Ang. |
|                                             |     | 1-x,1-y,1-z = | 2_666 | Check     |

### Alert level B

|                                                                    |       |              |       |           |       |
|--------------------------------------------------------------------|-------|--------------|-------|-----------|-------|
| PLAT306_ALERT_2_B Isolated Oxygen Atom (H-atoms Missing ?)         | ..... |              |       | 019       | Check |
| PLAT306_ALERT_2_B Isolated Oxygen Atom (H-atoms Missing ?)         | ..... |              |       | 020       | Check |
| PLAT306_ALERT_2_B Isolated Oxygen Atom (H-atoms Missing ?)         | ..... |              |       | 021       | Check |
| PLAT306_ALERT_2_B Isolated Oxygen Atom (H-atoms Missing ?)         | ..... |              |       | 022       | Check |
| PLAT306_ALERT_2_B Isolated Oxygen Atom (H-atoms Missing ?)         | ..... |              |       | 023       | Check |
| PLAT306_ALERT_2_B Isolated Oxygen Atom (H-atoms Missing ?)         | ..... |              |       | 024       | Check |
| PLAT306_ALERT_2_B Isolated Oxygen Atom (H-atoms Missing ?)         | ..... |              |       | 025       | Check |
| PLAT306_ALERT_2_B Isolated Oxygen Atom (H-atoms Missing ?)         | ..... |              |       | 026       | Check |
| PLAT306_ALERT_2_B Isolated Oxygen Atom (H-atoms Missing ?)         | ..... |              |       | 027       | Check |
| PLAT430_ALERT_2_B Short Inter D...A Contact                        | O1    | ..023        |       | 2.73 Ang. |       |
|                                                                    |       | x,y,1+z =    | 1_556 | Check     |       |
| PLAT430_ALERT_2_B Short Inter D...A Contact                        | O2    | ..020        |       | 2.73 Ang. |       |
|                                                                    |       | -1+x,y,1+z = | 1_456 | Check     |       |
| PLAT430_ALERT_2_B Short Inter D...A Contact                        | O4    | ..024        |       | 2.76 Ang. |       |
|                                                                    |       | -1+x,y,1+z = | 1_456 | Check     |       |
| PLAT430_ALERT_2_B Short Inter D...A Contact                        | O5    | ..019        |       | 2.82 Ang. |       |
|                                                                    |       | x,y,z =      | 1_555 | Check     |       |
| PLAT430_ALERT_2_B Short Inter D...A Contact                        | O7    | ..N33        |       | 2.65 Ang. |       |
|                                                                    |       | x,y,1+z =    | 1_556 | Check     |       |
| PLAT430_ALERT_2_B Short Inter D...A Contact                        | O11   | ..027        |       | 2.76 Ang. |       |
|                                                                    |       | x,y,z =      | 1_555 | Check     |       |
| PLAT430_ALERT_2_B Short Inter D...A Contact                        | O15   | ..017        |       | 2.74 Ang. |       |
|                                                                    |       | x,-1+y,z =   | 1_545 | Check     |       |
| PLAT430_ALERT_2_B Short Inter D...A Contact                        | O17   | ..N35        |       | 2.66 Ang. |       |
|                                                                    |       | x,y,z =      | 1_555 | Check     |       |
| PLAT430_ALERT_2_B Short Inter D...A Contact                        | O20   | ..024        |       | 2.72 Ang. |       |
|                                                                    |       | x,y,z =      | 1_555 | Check     |       |
| PLAT430_ALERT_2_B Short Inter D...A Contact                        | N35   | ..017'       |       | 2.79 Ang. |       |
|                                                                    |       | x,y,z =      | 1_555 | Check     |       |
| PLAT934_ALERT_3_B Number of (Iobs-Icalc)/SigmaW > 10 Outliers .... |       |              |       | 2         | Check |

### Alert level C

|                                                                   |       |          |       |          |
|-------------------------------------------------------------------|-------|----------|-------|----------|
| PLAT230_ALERT_2_C Hirshfeld Test Diff for                         | O6    | --C15    |       | 5.7 s.u. |
| PLAT241_ALERT_2_C High 'MainMol' Ueq as Compared to Neighbors of  |       |          | C53   | Check    |
| PLAT244_ALERT_4_C Low 'Solvent' Ueq as Compared to Neighbors of   |       |          | Cd3   | Check    |
| PLAT906_ALERT_3_C Large K Value in the Analysis of Variance ..... |       |          | 2.048 | Check    |
| PLAT911_ALERT_3_C Missing FCF Refl Between Thmin & STh/L=         | 0.600 |          | 24    | Report   |
| PLAT975_ALERT_2_C Check Calcd Resid. Dens.                        | 1.00A | From O24 | 0.61  | eA-3     |
| PLAT975_ALERT_2_C Check Calcd Resid. Dens.                        | 1.04A | From O20 | 0.61  | eA-3     |
| PLAT976_ALERT_2_C Check Calcd Resid. Dens.                        | 0.52A | From O23 | -0.94 | eA-3     |
| PLAT976_ALERT_2_C Check Calcd Resid. Dens.                        | 1.04A | From O23 | -0.66 | eA-3     |
| PLAT976_ALERT_2_C Check Calcd Resid. Dens.                        | 1.01A | From O22 | -0.63 | eA-3     |

|                   |                                                  |       |          |            |
|-------------------|--------------------------------------------------|-------|----------|------------|
| PLAT976_ALERT_2_C | Check Calcd Resid. Dens.                         | 0.47A | From O26 | -0.59 eA-3 |
| PLAT976_ALERT_2_C | Check Calcd Resid. Dens.                         | 0.41A | From O25 | -0.51 eA-3 |
| PLAT976_ALERT_2_C | Check Calcd Resid. Dens.                         | 0.50A | From O22 | -0.47 eA-3 |
| PLAT976_ALERT_2_C | Check Calcd Resid. Dens.                         | 0.60A | From O21 | -0.46 eA-3 |
| PLAT976_ALERT_2_C | Check Calcd Resid. Dens.                         | 0.52A | From O21 | -0.44 eA-3 |
| PLAT976_ALERT_2_C | Check Calcd Resid. Dens.                         | 0.64A | From O22 | -0.43 eA-3 |
| PLAT978_ALERT_2_C | Number C-C Bonds with Positive Residual Density. |       |          | 0 Info     |

## Alert level G

FORMU01\_ALERT\_2\_G There is a discrepancy between the atom counts in the  
     \_chemical\_formula\_sum and the formula from the \_atom\_site\* data.  
     Atom count from \_chemical\_formula\_sum: C90 H107.5 Cd3 Cl11.5 N36 O27  
     Atom count from the \_atom\_site data: C90. H82 Cd3 Cl11.5 N36 O27

ABSMU01\_ALERT\_1\_G Calculation of \_exptl\_absorpt\_correction\_mu  
     not performed for this radiation type.

CELLZ01\_ALERT\_1\_G Difference between formula and atom\_site contents detected.

CELLZ01\_ALERT\_1\_G WARNING: H atoms missing from atom site list. Is this intentional?  
     From the CIF: \_cell\_formula\_units\_Z 2  
     From the CIF: \_chemical\_formula\_sum C90 H107.50 Cd3 Cl11.50 N36 O27  
     TEST: Compare cell contents of formula and atom\_site data

| atom | Z*formula | cif sites | diff  |
|------|-----------|-----------|-------|
| C    | 180.00    | 180.00    | 0.00  |
| H    | 215.00    | 164.00    | 51.00 |
| Cd   | 6.00      | 6.00      | 0.00  |
| Cl   | 23.00     | 23.00     | 0.00  |
| N    | 72.00     | 72.00     | 0.00  |
| O    | 54.00     | 54.00     | 0.00  |

PLAT002\_ALERT\_2\_G Number of Distance or Angle Restraints on AtSite 19 Note

PLAT003\_ALERT\_2\_G Number of Uiso or Uij Restrained non-H Atoms ... 49 Report

PLAT041\_ALERT\_1\_G Calc. and Reported SumFormula Strings Differ Please Check

PLAT045\_ALERT\_1\_G Calculated and Reported Z Differ by a Factor ... 0.50 Check

PLAT068\_ALERT\_1\_G Reported F000 Differs from Calcd (or Missing)... Please Check

PLAT083\_ALERT\_2\_G SHELXL Second Parameter in WGHT Unusually Large 12.85 Why ?

PLAT154\_ALERT\_1\_G The s.u.'s on the Cell Angles are Equal ..(Note) 0.001 Degree

PLAT171\_ALERT\_4\_G The CIF-Embedded .res File Contains EADP Records 2 Report

PLAT172\_ALERT\_4\_G The CIF-Embedded .res File Contains DFIX Records 2 Report

PLAT178\_ALERT\_4\_G The CIF-Embedded .res File Contains SIMU Records 2 Report

PLAT186\_ALERT\_4\_G The CIF-Embedded .res File Contains ISOR Records 5 Report

PLAT233\_ALERT\_4\_G Hirshfeld (M-X Solvent) Cd2 --Cl4 10.8 s.u.

PLAT302\_ALERT\_4\_G Anion/Solvent/Minor-Residue Disorder (Resd 3 ) 48% Note

PLAT302\_ALERT\_4\_G Anion/Solvent/Minor-Residue Disorder (Resd 4 ) 48% Note

PLAT302\_ALERT\_4\_G Anion/Solvent/Minor-Residue Disorder (Resd 7 ) 100% Note

PLAT302\_ALERT\_4\_G Anion/Solvent/Minor-Residue Disorder (Resd 8 ) 100% Note

PLAT302\_ALERT\_4\_G Anion/Solvent/Minor-Residue Disorder (Resd 9 ) 100% Note

PLAT302\_ALERT\_4\_G Anion/Solvent/Minor-Residue Disorder (Resd 10 ) 100% Note

PLAT302\_ALERT\_4\_G Anion/Solvent/Minor-Residue Disorder (Resd 20 ) 100% Note

PLAT302\_ALERT\_4\_G Anion/Solvent/Minor-Residue Disorder (Resd 21 ) 100% Note

PLAT304\_ALERT\_4\_G Non-Integer Number of Atoms in ..... Resd 7 0.35 Check

PLAT304\_ALERT\_4\_G Non-Integer Number of Atoms in ..... Resd 8 0.15 Check

PLAT304\_ALERT\_4\_G Non-Integer Number of Atoms in ..... Resd 9 0.80 Check

PLAT304\_ALERT\_4\_G Non-Integer Number of Atoms in ..... Resd 10 0.51 Check

PLAT304\_ALERT\_4\_G Non-Integer Number of Atoms in ..... Resd 20 0.20 Check

PLAT304\_ALERT\_4\_G Non-Integer Number of Atoms in ..... Resd 21 0.49 Check

PLAT311\_ALERT\_2\_G Isolated Disordered Oxygen Atom (No H's ?) ..... 017 Check

PLAT311\_ALERT\_2\_G Isolated Disordered Oxygen Atom (No H's ?) ..... 018' Check

PLAT311\_ALERT\_2\_G Isolated Disordered Oxygen Atom (No H's ?) ..... 017' Check

PLAT311\_ALERT\_2\_G Isolated Disordered Oxygen Atom (No H's ?) ..... 018 Check

PLAT431\_ALERT\_2\_G Short Inter HL..A Contact Cl10 ..O21 3.12 Ang.  
     x,y,z = 1\_555 Check

|                                                                      |      |               |             |
|----------------------------------------------------------------------|------|---------------|-------------|
| PLAT431_ALERT_2_G Short Inter HL..A Contact                          | Cl11 | ..O22         | 3.12 Ang.   |
|                                                                      |      | x,y,z =       | 1_555 Check |
| PLAT432_ALERT_2_G Short Inter X...Y Contact                          | Cl10 | ..C19         | 3.11 Ang.   |
|                                                                      |      | x,y,z =       | 1_555 Check |
| PLAT432_ALERT_2_G Short Inter X...Y Contact                          | O3   | ..C90'        | 2.96 Ang.   |
|                                                                      |      | x,y,l+z =     | 1_556 Check |
| PLAT432_ALERT_2_G Short Inter X...Y Contact                          | O7   | ..C49         | 2.99 Ang.   |
|                                                                      |      | x,y,l+z =     | 1_556 Check |
| PLAT432_ALERT_2_G Short Inter X...Y Contact                          | O10  | ..C70         | 3.01 Ang.   |
|                                                                      |      | 1-x,1-y,1-z = | 2_666 Check |
| PLAT432_ALERT_2_G Short Inter X...Y Contact                          | O12  | ..C76         | 3.01 Ang.   |
|                                                                      |      | 1-x,1-y,1-z = | 2_666 Check |
| PLAT432_ALERT_2_G Short Inter X...Y Contact                          | O14  | ..C69'        | 2.95 Ang.   |
|                                                                      |      | 1-x,1-y,1-z = | 2_666 Check |
| PLAT432_ALERT_2_G Short Inter X...Y Contact                          | O22  | ..C77         | 2.98 Ang.   |
|                                                                      |      | 1-x,1-y,1-z = | 2_666 Check |
| PLAT432_ALERT_2_G Short Inter X...Y Contact                          | O22  | ..C71         | 3.01 Ang.   |
|                                                                      |      | 1-x,1-y,1-z = | 2_666 Check |
| PLAT606_ALERT_4_G VERY LARGE Solvent Accessible VOID(S) in Structure |      |               | ! Info      |
| PLAT794_ALERT_5_G Tentative Bond Valency for Cd1                     | (II) | .             | 2.07 Info   |
| PLAT794_ALERT_5_G Tentative Bond Valency for Cd2                     | (II) | .             | 1.99 Info   |
| PLAT794_ALERT_5_G Tentative Bond Valency for Cd3                     | (II) | .             | 1.94 Info   |
| PLAT860_ALERT_3_G Number of Least-Squares Restraints .....           |      |               | 402 Note    |
| PLAT869_ALERT_4_G ALERTS Related to the Use of SQUEEZE Suppressed    |      |               | ! Info      |
| PLAT910_ALERT_3_G Missing # of FCF Reflection(s) Below Theta(Min).   |      |               | 2 Note      |
| PLAT912_ALERT_4_G Missing # of FCF Reflections Above STh/L= 0.600    |      |               | 67 Note     |
| PLAT933_ALERT_2_G Number of OMIT Records in Embedded .res File ...   |      |               | 1 Note      |

---

4 **ALERT level A** = Most likely a serious problem - resolve or explain  
 20 **ALERT level B** = A potentially serious problem, consider carefully  
 17 **ALERT level C** = Check. Ensure it is not caused by an omission or oversight  
 53 **ALERT level G** = General information/check it is not something unexpected

7 ALERT type 1 CIF construction/syntax error, inconsistent or missing data  
 56 ALERT type 2 Indicator that the structure model may be wrong or deficient  
 5 ALERT type 3 Indicator that the structure quality may be low  
 23 ALERT type 4 Improvement, methodology, query or suggestion  
 3 ALERT type 5 Informative message, check

---

It is advisable to attempt to resolve as many as possible of the alerts in all categories. Often the minor alerts point to easily fixed oversights, errors and omissions in your CIF or refinement strategy, so attention to these fine details can be worthwhile. In order to resolve some of the more serious problems it may be necessary to carry out additional measurements or structure refinements. However, the purpose of your study may justify the reported deviations and the more serious of these should normally be commented upon in the discussion or experimental section of a paper or in the "special\_details" fields of the CIF. checkCIF was carefully designed to identify outliers and unusual parameters, but every test has its limitations and alerts that are not important in a particular case may appear. Conversely, the absence of alerts does not guarantee there are no aspects of the results needing attention. It is up to the individual to critically assess their own results and, if necessary, seek expert advice.

### **Publication of your CIF in IUCr journals**

A basic structural check has been run on your CIF. These basic checks will be run on all CIFs submitted for publication in IUCr journals (*Acta Crystallographica*, *Journal of Applied Crystallography*, *Journal of Synchrotron Radiation*); however, if you intend to submit to *Acta Crystallographica Section C* or *E* or *IUCrData*, you should make sure that full publication checks are run on the final version of your CIF prior to submission.

### **Publication of your CIF in other journals**

Please refer to the *Notes for Authors* of the relevant journal for any special instructions relating to CIF submission.

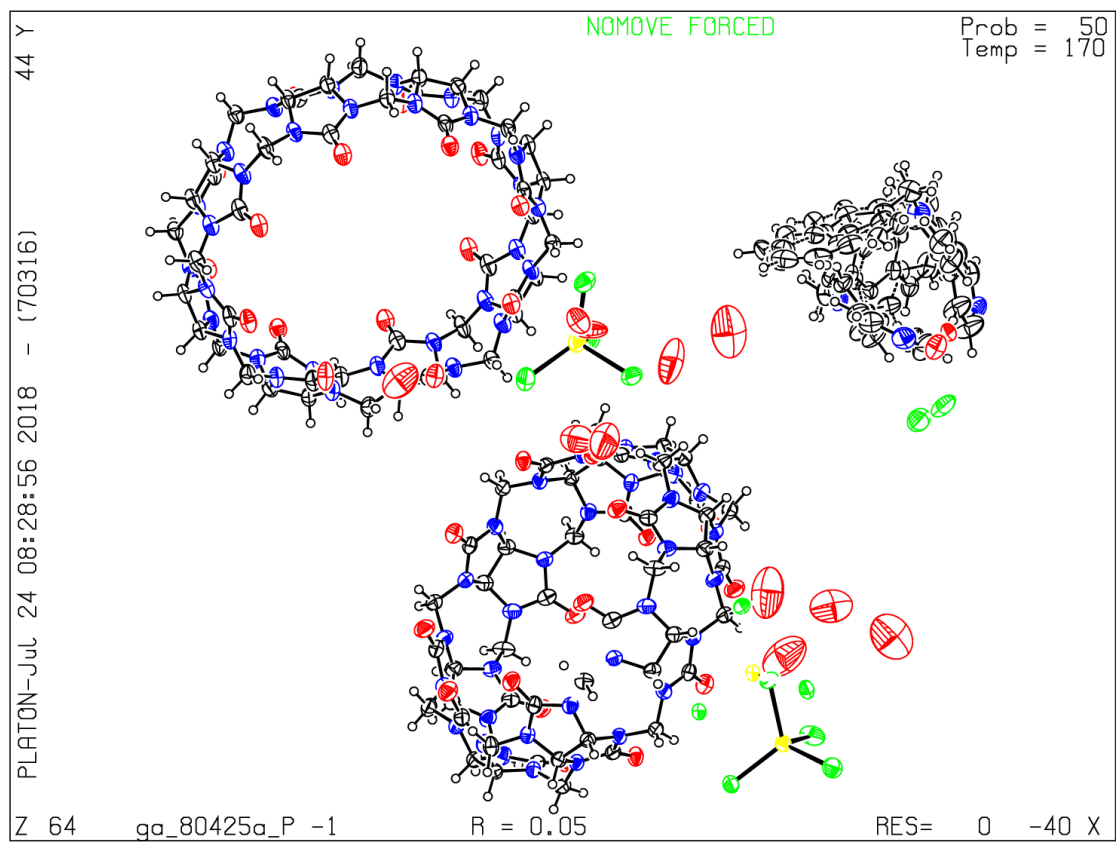

Supplement: s1 [file s1]
