# Supplementary material for: Supramolecular Crystal Networks Constructed from Cucurbit[8]uril with Two Naphthyl Groups
Source: MDPI journal article supplement (doi:10.3390/molecules28010063), 2022-12-21

# checkCIF/PLATON report

Structure factors have been supplied for datablock(s) platon\_sq

THIS REPORT IS FOR GUIDANCE ONLY. IF USED AS PART OF A REVIEW PROCEDURE FOR PUBLICATION, IT SHOULD NOT REPLACE THE EXPERTISE OF AN EXPERIENCED CRYSTALLOGRAPHIC REFEREE.

No syntax errors found.      CIF dictionary      Interpreting this report

## Datablock: platon\_sq

---

Bond precision:    C-C = 0.0082 Å                      Wavelength=1.34138

Cell:                      a=19.2256(6)              b=21.7208(7)              c=30.3651(9)  
                            alpha=90              beta=90              gamma=90  
Temperature:              173 K

|                        | Calculated                                                 | Reported             |
|------------------------|------------------------------------------------------------|----------------------|
| Volume                 | 12680.3(7)                                                 | 12680.3(7)           |
| Space group            | P b c a                                                    | P b c a              |
| Hall group             | : -P 2ac 2a                                                | -P 2ac 2a            |
| Moiety formula         | C48 H48 N32 O16, 2(C23 H18 N O2), 4(Cl), 12(O) [+ solvent] | ?                    |
| Sum formula            | C94 H84 Cl4 N34 O32 [+ solvent]                            | C94 H110 Cl4 N34 O32 |
| Mr                     | 2343.75                                                    | 2369.95              |
| Dx, g cm <sup>-3</sup> | 1.228                                                      | 1.241                |
| Z                      | 4                                                          | 4                    |
| Mu (mm <sup>-1</sup> ) | 1.009                                                      | 1.010                |
| F000                   | 4840.0                                                     | 4944.0               |
| F000'                  | 4857.56                                                    |                      |
| h,k,lmax               | 23,26,37                                                   | 23,26,37             |
| Nref                   | 12047                                                      | 11990                |
| Tmin,Tmax              | 0.712,0.724                                                | 0.465,0.751          |
| Tmin'                  | 0.636                                                      |                      |

Correction method= # Reported T Limits: Tmin=0.465 Tmax=0.751  
AbsCorr = MULTI-SCAN

Data completeness= 0.995                      Theta(max)= 54.856

R(reflections)= 0.1028( 9628)              wR2(reflections)= 0.3507( 11990)

S = 1.210                      Npar= 749

The following ALERTS were generated. Each ALERT has the format

**test-name\_ALERT\_alert-type\_alert-level.**

Click on the hyperlinks for more details of the test.

---

### Alert level A

|                   |                                        |           |       |       |
|-------------------|----------------------------------------|-----------|-------|-------|
| PLAT260_ALERT_2_A | Large Average Ueq of Residue Including | O16       | 0.208 | Check |
| PLAT430_ALERT_2_A | Short Inter D...A Contact              | O11 ..O13 | 2.51  | Ang.  |
|                   |                                        | x,y,z =   | 1_555 | Check |

---

### Alert level B

|                   |                                             |                  |       |       |
|-------------------|---------------------------------------------|------------------|-------|-------|
| PLAT260_ALERT_2_B | Large Average Ueq of Residue Including      | CL2'             | 0.189 | Check |
| PLAT306_ALERT_2_B | Isolated Oxygen Atom (H-atoms Missing ?)    | .....            | O11   | Check |
| PLAT306_ALERT_2_B | Isolated Oxygen Atom (H-atoms Missing ?)    | .....            | O12   | Check |
| PLAT306_ALERT_2_B | Isolated Oxygen Atom (H-atoms Missing ?)    | .....            | O13   | Check |
| PLAT306_ALERT_2_B | Isolated Oxygen Atom (H-atoms Missing ?)    | .....            | O14   | Check |
| PLAT306_ALERT_2_B | Isolated Oxygen Atom (H-atoms Missing ?)    | .....            | O15   | Check |
| PLAT306_ALERT_2_B | Isolated Oxygen Atom (H-atoms Missing ?)    | .....            | O16   | Check |
| PLAT430_ALERT_2_B | Short Inter D...A Contact                   | O2 ..O11         | 2.73  | Ang.  |
|                   |                                             | 1/2-x,1/2+y,z =  | 8_665 | Check |
| PLAT430_ALERT_2_B | Short Inter D...A Contact                   | O4 ..O11         | 2.80  | Ang.  |
|                   |                                             | 1/2-x,1/2+y,z =  | 8_665 | Check |
| PLAT430_ALERT_2_B | Short Inter D...A Contact                   | O10 ..N9         | 2.86  | Ang.  |
|                   |                                             | 3/2-x,-1/2+y,z = | 8_755 | Check |
| PLAT430_ALERT_2_B | Short Inter D...A Contact                   | O13 ..O15        | 2.60  | Ang.  |
|                   |                                             | x,y,z =          | 1_555 | Check |
| PLAT430_ALERT_2_B | Short Inter D...A Contact                   | O13 ..O14        | 2.67  | Ang.  |
|                   |                                             | x,1/2-y,-1/2+z = | 7_565 | Check |
| PLAT934_ALERT_3_B | Number of (Iobs-Icalc)/SigmaW > 10 Outliers | ....             | 6     | Check |

---

### Alert level C

|                   |                                                |                 |         |        |
|-------------------|------------------------------------------------|-----------------|---------|--------|
| PLAT084_ALERT_3_C | High wR2 Value (i.e. > 0.25)                   | .....           | 0.35    | Report |
| PLAT112_ALERT_2_C | ADDSYM Detects New (Pseudo) Symm. Elem         | C               | 80      | %Fit   |
| PLAT230_ALERT_2_C | Hirshfeld Test Diff for                        | C37 --C46       | 5.8     | s.u.   |
| PLAT234_ALERT_4_C | Large Hirshfeld Difference                     | C27 --C28       | 0.16    | Ang.   |
| PLAT234_ALERT_4_C | Large Hirshfeld Difference                     | C42 --C43       | 0.18    | Ang.   |
| PLAT234_ALERT_4_C | Large Hirshfeld Difference                     | C43 --C44       | 0.17    | Ang.   |
| PLAT241_ALERT_2_C | High 'MainMol' Ueq as Compared to Neighbors of |                 | C36     | Check  |
| PLAT241_ALERT_2_C | High 'MainMol' Ueq as Compared to Neighbors of |                 | C43     | Check  |
| PLAT241_ALERT_2_C | High 'MainMol' Ueq as Compared to Neighbors of |                 | C46     | Check  |
| PLAT242_ALERT_2_C | Low 'MainMol' Ueq as Compared to Neighbors of  |                 | C37     | Check  |
| PLAT242_ALERT_2_C | Low 'MainMol' Ueq as Compared to Neighbors of  |                 | C44     | Check  |
| PLAT260_ALERT_2_C | Large Average Ueq of Residue Including         | CL2             | 0.127   | Check  |
| PLAT260_ALERT_2_C | Large Average Ueq of Residue Including         | O11             | 0.102   | Check  |
| PLAT260_ALERT_2_C | Large Average Ueq of Residue Including         | O12             | 0.138   | Check  |
| PLAT260_ALERT_2_C | Large Average Ueq of Residue Including         | O13             | 0.120   | Check  |
| PLAT260_ALERT_2_C | Large Average Ueq of Residue Including         | O14             | 0.128   | Check  |
| PLAT260_ALERT_2_C | Large Average Ueq of Residue Including         | O15             | 0.133   | Check  |
| PLAT334_ALERT_2_C | Small Aver. Benzene C-C Dist                   | C39 -C44        | 1.37    | Ang.   |
| PLAT340_ALERT_3_C | Low Bond Precision on C-C Bonds                | .....           | 0.00818 | Ang.   |
| PLAT430_ALERT_2_C | Short Inter D...A Contact                      | O7 ..O16        | 2.90    | Ang.   |
|                   |                                                | x,3/2-y,1/2+z = | 7_576   | Check  |
| PLAT906_ALERT_3_C | Large K Value in the Analysis of Variance      | .....           | 9.117   | Check  |
| PLAT911_ALERT_3_C | Missing FCF Refl Between Thmin & STh/L=        | 0.600           | 35      | Report |
| PLAT913_ALERT_3_C | Missing # of Very Strong Reflections in FCF    | ....            | 4       | Note   |
| PLAT918_ALERT_3_C | Reflection(s) with I(obs) much Smaller I(calc) | .               | 7       | Check  |
| PLAT975_ALERT_2_C | Check Calcd Resid. Dens.                       | 0.92A From O16  | 0.67    | eA-3   |
| PLAT976_ALERT_2_C | Check Calcd Resid. Dens.                       | 0.99A From O16  | -0.46   | eA-3   |



6 ALERT type 1 CIF construction/syntax error, inconsistent or missing data  
44 ALERT type 2 Indicator that the structure model may be wrong or deficient  
9 ALERT type 3 Indicator that the structure quality may be low  
15 ALERT type 4 Improvement, methodology, query or suggestion  
1 ALERT type 5 Informative message, check

---

It is advisable to attempt to resolve as many as possible of the alerts in all categories. Often the minor alerts point to easily fixed oversights, errors and omissions in your CIF or refinement strategy, so attention to these fine details can be worthwhile. In order to resolve some of the more serious problems it may be necessary to carry out additional measurements or structure refinements. However, the purpose of your study may justify the reported deviations and the more serious of these should normally be commented upon in the discussion or experimental section of a paper or in the "special\_details" fields of the CIF. checkCIF was carefully designed to identify outliers and unusual parameters, but every test has its limitations and alerts that are not important in a particular case may appear. Conversely, the absence of alerts does not guarantee there are no aspects of the results needing attention. It is up to the individual to critically assess their own results and, if necessary, seek expert advice.

### **Publication of your CIF in IUCr journals**

A basic structural check has been run on your CIF. These basic checks will be run on all CIFs submitted for publication in IUCr journals (*Acta Crystallographica*, *Journal of Applied Crystallography*, *Journal of Synchrotron Radiation*); however, if you intend to submit to *Acta Crystallographica Section C* or *E* or *IUCrData*, you should make sure that full publication checks are run on the final version of your CIF prior to submission.

### **Publication of your CIF in other journals**

Please refer to the *Notes for Authors* of the relevant journal for any special instructions relating to CIF submission.

---

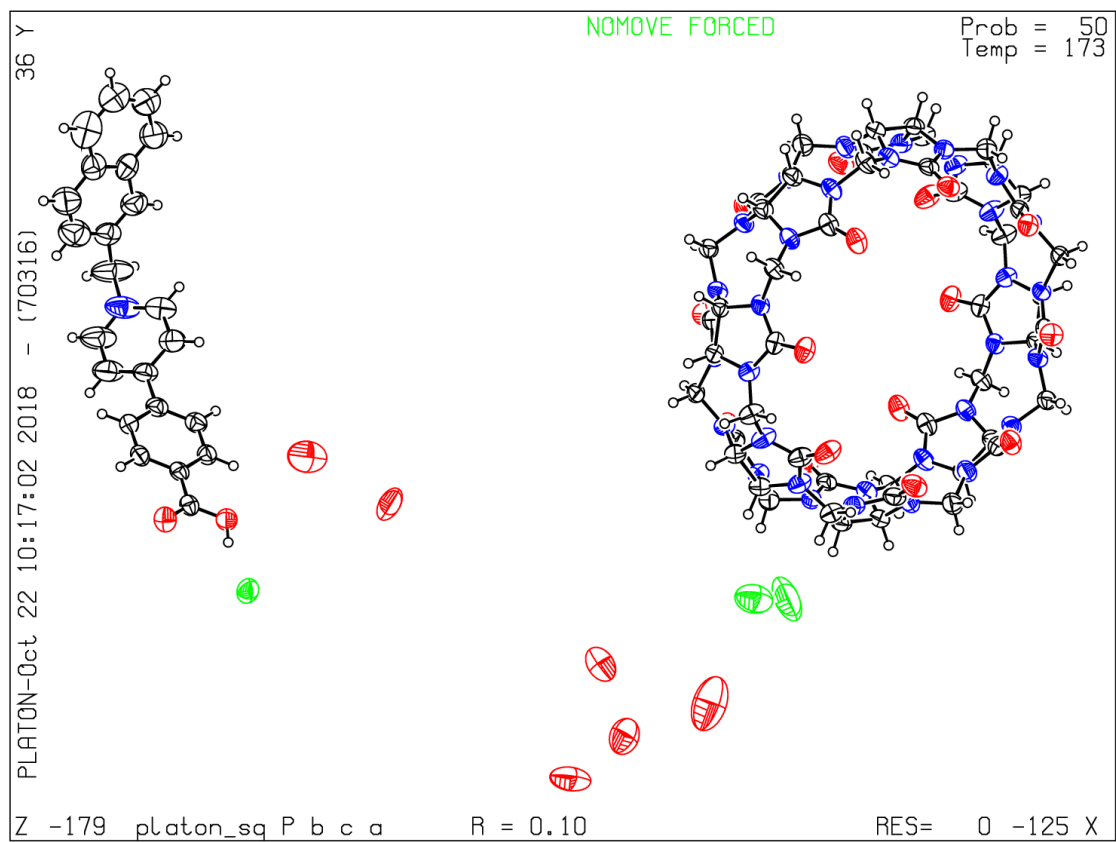

Supplement: s1 [file s1]
